# Supplementary material for: Analysis of tumor mutation burden combined with immune infiltrates in endometrial cancer
Source: PubMed Central journal article supplement — Ann Transl Med. 2021 Apr;9(7):551. doi: 10.21037/atm-20-6049 (PMC8105813; doi:10.21037/atm-20-6049), 2021-04
Supplement: atm-09-07-551-supplementary.pdf [file atm-09-07-551-supplementary.pdf]

**Calculation of TMB for 529 EC patients**

| id                           | TMB      |
|------------------------------|----------|
| TCGA-D1-A1O8-01A-11D-A14G-09 | 2.5      |
| TCGA-AX-A1CI-01A-11D-A135-09 | 2.157895 |
| TCGA-AJ-A5DW-01A-11D-A27P-09 | 138.7368 |
| TCGA-BG-A0YU-01A-21D-A10M-09 | 0.789474 |
| TCGA-B5-A0K0-01A-11W-A062-09 | 0.578947 |
| TCGA-BG-A3EW-01A-11D-A228-09 | 27.10526 |
| TCGA-EY-A1GF-01A-11D-A13L-09 | 22.39474 |
| TCGA-EO-A22S-01A-11D-A18P-09 | 40.65789 |
| TCGA-B5-A0JX-01A-21D-A14K-09 | 2.631579 |
| TCGA-AX-A06J-01A-11W-A027-09 | 1.947368 |
| TCGA-AP-A0LI-01A-11W-A062-09 | 3.078947 |
| TCGA-BS-A0V6-01A-11D-A122-09 | 1.736842 |
| TCGA-BG-A221-01A-21D-A159-09 | 53.07895 |
| TCGA-AX-A2H7-01A-12D-A18P-09 | 3.552632 |
| TCGA-A5-A0GE-01A-11W-A062-09 | 0.842105 |
| TCGA-D1-A3DG-01A-11D-A19Y-09 | 4.5      |
| TCGA-EO-A3AZ-01A-12D-A19Y-09 | 47.60526 |
| TCGA-E6-A8L9-01A-21D-A37N-09 | 2.131579 |
| TCGA-D1-A17Q-01A-11D-A12J-09 | 203.4474 |
| TCGA-AJ-A3QS-01A-11D-A228-09 | 8.631579 |
| TCGA-5B-A90C-01A-11D-A37N-09 | 2.105263 |
| TCGA-AP-A0LJ-01A-11W-A062-09 | 1.315789 |
| TCGA-A5-A1OK-01A-11D-A14K-09 | 1.815789 |
| TCGA-AJ-A3OL-01A-11D-A228-09 | 18.07895 |
| TCGA-EO-A22Y-01A-11D-A17W-09 | 2.026316 |
| TCGA-BK-A0C9-01A-11W-A027-09 | 17       |
| TCGA-AX-A1CF-01A-11D-A135-09 | 4.315789 |
| TCGA-D1-A163-01A-11D-A12J-09 | 23.13158 |
| TCGA-AX-A05W-01A-21W-A027-09 | 1.842105 |
| TCGA-D1-A176-01A-11D-A12J-09 | 14.18421 |
| TCGA-BS-A0UM-01A-11W-A10C-09 | 14.34211 |
| TCGA-AX-A05Y-01A-11W-A027-09 | 6.105263 |
| TCGA-QS-A5YQ-01A-11D-A31U-09 | 41.78947 |
| TCGA-B5-A0JT-01A-21D-A122-09 | 1.631579 |
| TCGA-QS-A744-01A-11D-A34Q-09 | 2.552632 |
| TCGA-AX-A0J1-01A-11W-A062-09 | 172.1842 |
| TCGA-AP-A1DH-01A-31D-A135-09 | 32.15789 |
| TCGA-BS-A0UT-01A-11D-A10B-09 | 1.184211 |
| TCGA-EY-A1GL-01A-11D-A13L-09 | 1.868421 |

|                              |          |
|------------------------------|----------|
| TCGA-B5-A0K2-01A-12W-A10C-09 | 10.47368 |
| TCGA-FI-A3PV-01A-11D-A228-09 | 2.631579 |
| TCGA-BG-A0VT-01A-11D-A10M-09 | 0.973684 |
| TCGA-D1-A169-01A-11D-A12J-09 | 1.526316 |
| TCGA-D1-A0ZQ-01A-11D-A122-09 | 2.921053 |
| TCGA-AJ-A3EL-01A-11D-A20S-09 | 339.8158 |
| TCGA-EO-A22R-01A-11D-A18P-09 | 585.4737 |
| TCGA-AX-A1C5-01A-11D-A135-09 | 42.57895 |
| TCGA-AX-A2H2-01A-11D-A17W-09 | 6.447368 |
| TCGA-D1-A1O5-01A-11D-A14G-09 | 2.210526 |
| TCGA-D1-A167-01A-11D-A12J-09 | 60       |
| TCGA-BK-A13C-01A-11D-A122-09 | 1.526316 |
| TCGA-A5-A0VP-01A-21D-A10B-09 | 48.55263 |
| TCGA-BG-A0YV-01A-11D-A10M-09 | 2.684211 |
| TCGA-AX-A064-01A-11W-A027-09 | 10.07895 |
| TCGA-BG-A0MS-01A-11D-A10B-09 | 1.394737 |
| TCGA-D1-A102-01A-11D-A10M-09 | 1.684211 |
| TCGA-BG-A0M8-01A-12D-A10B-09 | 2.026316 |
| TCGA-DI-A1NN-01A-11D-A16D-09 | 1.763158 |
| TCGA-AP-A059-01A-21D-A122-09 | 382.5263 |
| TCGA-AX-A1CE-01A-11D-A135-09 | 516.1316 |
| TCGA-B5-A0JS-01A-11D-A10B-09 | 0.921053 |
| TCGA-AX-A0J0-01A-11D-A117-09 | 276.1579 |
| TCGA-EY-A3L3-01A-11D-A228-09 | 2.263158 |
| TCGA-PG-A5BC-01A-12D-A27P-09 | 1.815789 |
| TCGA-D1-A17U-01A-21D-A12J-09 | 13.84211 |
| TCGA-A5-A0GJ-01A-11W-A062-09 | 2.263158 |
| TCGA-AX-A3GB-01A-11D-A228-09 | 3.026316 |
| TCGA-D1-A17S-01A-11D-A12J-09 | 1.5      |
| TCGA-A5-A0GV-01A-31W-A062-09 | 1.526316 |
| TCGA-BS-A0UJ-01A-12D-A10B-09 | 62       |
| TCGA-D1-A177-01A-21D-A12J-09 | 30.44737 |
| TCGA-D1-A16G-01A-31D-A12J-09 | 1.105263 |
| TCGA-DF-A2KU-01A-11D-A17W-09 | 446.1579 |
| TCGA-AP-A054-01A-11W-A062-09 | 41.84211 |
| TCGA-AJ-A23O-01A-11D-A159-09 | 40.15789 |
| TCGA-EY-A2OQ-01A-11D-A19Y-09 | 1.868421 |
| TCGA-AX-A3FW-01A-11D-A228-09 | 2.236842 |
| TCGA-DF-A2KR-01A-11D-A17W-09 | 3.394737 |
| TCGA-B5-A11V-01A-11D-A10M-09 | 1.947368 |
| TCGA-BG-A0LX-01A-11W-A062-09 | 18.60526 |

|                              |          |
|------------------------------|----------|
| TCGA-BG-A0M0-01A-11W-A10C-09 | 5.605263 |
| TCGA-AJ-A2QO-01A-11D-A18P-09 | 61.73684 |
| TCGA-EY-A4KR-01A-11D-A27P-09 | 2.368421 |
| TCGA-A5-A3LP-01A-11D-A228-09 | 2.157895 |
| TCGA-EO-A2CG-01A-12D-A17W-09 | 1.447368 |
| TCGA-AX-A06H-01A-11D-A122-09 | 16.31579 |
| TCGA-EY-A1GV-01A-11D-A13L-09 | 1.184211 |
| TCGA-BG-A0VZ-01A-11D-A10G-09 | 12.84211 |
| TCGA-AJ-A3I9-01A-11D-A228-09 | 1.342105 |
| TCGA-SL-A6JA-01A-11D-A31U-09 | 40.89474 |
| TCGA-D1-A16E-01A-22D-A12J-09 | 2        |
| TCGA-A5-A2K5-01A-11D-A17W-09 | 357.6579 |
| TCGA-D1-A15W-01A-11D-A122-09 | 2.263158 |
| TCGA-BG-A0M3-01A-11W-A10C-09 | 2.052632 |
| TCGA-EC-A1QX-01A-31D-A16D-09 | 30.10526 |
| TCGA-BS-A0UL-01A-11D-A10G-09 | 13.57895 |
| TCGA-D1-A16S-01A-11D-A12J-09 | 1.657895 |
| TCGA-FI-A2EU-01A-11D-A17D-09 | 1.657895 |
| TCGA-B5-A1MS-01B-11D-A228-09 | 1.921053 |
| TCGA-D1-A1NS-01A-11D-A14G-09 | 14.60526 |
| TCGA-B5-A3F9-01A-21D-A228-09 | 1.815789 |
| TCGA-EY-A2OM-01A-11D-A18P-09 | 38.92105 |
| TCGA-B5-A11R-01A-11D-A122-09 | 23.76316 |
| TCGA-D1-A0ZR-01A-21D-A10M-09 | 1.631579 |
| TCGA-AX-A3FT-01A-11D-A228-09 | 62.02632 |
| TCGA-AP-A0LF-01A-11D-A122-09 | 6.868421 |
| TCGA-FI-A2D5-01A-11D-A17D-09 | 579.7895 |
| TCGA-BS-A0U7-01A-21D-A10B-09 | 6.236842 |
| TCGA-BG-A0W1-01A-12D-A10G-09 | 2.236842 |
| TCGA-D1-A16R-01A-11D-A12J-09 | 1.342105 |
| TCGA-BK-A26L-01A-11D-A272-09 | 2.789474 |
| TCGA-B5-A5OE-01A-11D-A31U-09 | 2.684211 |
| TCGA-EY-A1H0-01A-11D-A13L-09 | 24.36842 |
| TCGA-AX-A2HJ-01A-11D-A17D-09 | 85.78947 |
| TCGA-EO-A3KW-01A-11D-A228-09 | 1.842105 |
| TCGA-DF-A2KZ-01A-11D-A20S-09 | 34.68421 |
| TCGA-DF-A2KS-01A-11D-A18P-09 | 4.5      |
| TCGA-AX-A1C8-01A-11D-A135-09 | 1.921053 |
| TCGA-KJ-A3U4-01A-11D-A228-09 | 1.973684 |
| TCGA-AX-A3G3-01A-11D-A20S-09 | 4.605263 |
| TCGA-BS-A0V4-01A-11D-A14G-09 | 18.89474 |

|                              |          |
|------------------------------|----------|
| TCGA-D1-A103-01A-11D-A10M-09 | 253.9211 |
| TCGA-QF-A5YT-01A-11D-A31U-09 | 0.131579 |
| TCGA-AX-A3G7-01A-12D-A20S-09 | 1.157895 |
| TCGA-B5-A1MY-01A-11D-A142-09 | 1.342105 |
| TCGA-EO-A3L0-01A-11D-A228-09 | 3.421053 |
| TCGA-AP-A1E3-01A-11D-A135-09 | 1.394737 |
| TCGA-B5-A0K8-01A-11D-A14K-09 | 1.342105 |
| TCGA-EY-A1GW-01A-22D-A13L-09 | 2.184211 |
| TCGA-BG-A0MO-01A-11W-A062-09 | 1.473684 |
| TCGA-AP-A0LS-01A-11D-A14G-09 | 25.76316 |
| TCGA-D1-A1NX-01A-11D-A16D-09 | 1.473684 |
| TCGA-E6-A1LX-01A-11D-A14G-09 | 520      |
| TCGA-B5-A0K4-01A-11W-A062-09 | 1.631579 |
| TCGA-AJ-A8CT-01A-11D-A37N-09 | 28.60526 |
| TCGA-A5-A2K4-01A-11D-A18P-09 | 1.184211 |
| TCGA-D1-A3JP-01A-31D-A228-09 | 1.842105 |
| TCGA-FI-A2F8-01A-12D-A17D-09 | 2.078947 |
| TCGA-EY-A1GE-01A-11D-A13L-09 | 1.657895 |
| TCGA-AX-A06F-01A-11W-A027-09 | 283.8947 |
| TCGA-AP-A0L9-01A-11W-A062-09 | 2.105263 |
| TCGA-EY-A1GX-01A-12D-A13L-09 | 3.394737 |
| TCGA-EY-A1GR-01A-11D-A13L-09 | 2.210526 |
| TCGA-A5-A10G-01A-11D-A14G-09 | 1.078947 |
| TCGA-EC-A24G-01A-11D-A16D-09 | 50.5     |
| TCGA-B5-A11Z-01A-11D-A10M-09 | 1.973684 |
| TCGA-A5-A2K7-01A-11D-A17W-09 | 36.02632 |
| TCGA-BS-A0U5-01A-11D-A10G-09 | 2        |
| TCGA-BG-A18B-01A-11D-A12J-09 | 14.89474 |
| TCGA-BG-A220-01A-11D-A159-09 | 42.76316 |
| TCGA-AX-A2HH-01A-11D-A17D-09 | 1.710526 |
| TCGA-BK-A56F-01A-32D-A27P-09 | 2.236842 |
| TCGA-AJ-A23M-01A-11D-A159-09 | 3.184211 |
| TCGA-D1-A17H-01A-11D-A12J-09 | 23.65789 |
| TCGA-A5-A7WK-01A-11D-A34Q-09 | 3.157895 |
| TCGA-D1-A101-01A-12D-A10M-09 | 10.42105 |
| TCGA-BS-A0TE-01A-11D-A10B-09 | 10.73684 |
| TCGA-D1-A17B-01A-22D-A12J-09 | 9.289474 |
| TCGA-A5-A0GA-01A-11W-A062-09 | 11.71053 |
| TCGA-EY-A3QX-01A-11D-A228-09 | 2.394737 |
| TCGA-DI-A1BY-01A-21D-A135-09 | 2.447368 |
| TCGA-A5-A0GH-01A-21W-A062-09 | 18.44737 |

|                              |          |
|------------------------------|----------|
| TCGA-EO-A2CH-01A-11D-A17W-09 | 1.578947 |
| TCGA-A5-A0R7-01A-31D-A10B-09 | 1.421053 |
| TCGA-AX-A0IS-01A-12D-A10M-09 | 1.710526 |
| TCGA-AX-A05T-01A-11W-A027-09 | 1.842105 |
| TCGA-A5-A0GX-01A-11W-A062-09 | 0.894737 |
| TCGA-BG-A0VV-01A-21D-A122-09 | 1.421053 |
| TCGA-B5-A11O-01A-11D-A122-09 | 2.342105 |
| TCGA-D1-A16X-01A-11D-A12J-09 | 69.68421 |
| TCGA-B5-A1MU-01A-11D-A13L-09 | 0.157895 |
| TCGA-BG-A0MA-01A-11D-A17D-09 | 1.736842 |
| TCGA-B5-A11W-01A-12D-A122-09 | 2.315789 |
| TCGA-E6-A1M0-01A-11D-A142-09 | 77.52632 |
| TCGA-D1-A1NW-01A-11D-A14K-09 | 1.342105 |
| TCGA-EY-A1GT-01A-11D-A13L-09 | 3.157895 |
| TCGA-B5-A3FH-01A-11D-A19Y-09 | 1.868421 |
| TCGA-D1-A1O0-01A-11D-A17D-09 | 2.526316 |
| TCGA-AX-A3FX-01A-11D-A228-09 | 2.078947 |
| TCGA-BK-A0CB-01A-32D-A10B-09 | 1.236842 |
| TCGA-EY-A1GP-01A-11D-A13L-09 | 1.473684 |
| TCGA-AP-A056-01A-11W-A027-09 | 300.9737 |
| TCGA-AX-A063-01A-11W-A027-09 | 35.26316 |
| TCGA-AP-A1DP-01A-11D-A135-09 | 27.97368 |
| TCGA-B5-A11N-01A-11D-A122-09 | 61.07895 |
| TCGA-AX-A3G1-01A-11D-A228-09 | 1.868421 |
| TCGA-AJ-A3NF-01A-11D-A228-09 | 1.394737 |
| TCGA-AX-A2HC-01A-11D-A17D-09 | 599.2368 |
| TCGA-BS-A0UV-01A-11D-A10B-09 | 324.2105 |
| TCGA-SL-A6J9-01A-11D-A31U-09 | 2.078947 |
| TCGA-EY-A2ON-01A-21D-A18P-09 | 2.447368 |
| TCGA-EY-A1GU-01A-11D-A13L-09 | 62.94737 |
| TCGA-AP-A052-01A-11W-A027-09 | 0.921053 |
| TCGA-AP-A1E0-01A-11D-A135-09 | 204.6053 |
| TCGA-FI-A2D2-01A-11D-A17D-09 | 1.157895 |
| TCGA-D1-A168-01A-31D-A12J-09 | 1.842105 |
| TCGA-B5-A1MV-01A-31D-A14G-09 | 2.736842 |
| TCGA-EY-A1G7-01A-11D-A13L-09 | 4.105263 |
| TCGA-EY-A210-01A-11D-A159-09 | 1.763158 |
| TCGA-D1-A16I-01A-11D-A12J-09 | 1.157895 |
| TCGA-B5-A0JZ-01A-11W-A062-09 | 20.55263 |
| TCGA-AX-A062-01A-11W-A027-09 | 0.894737 |
| TCGA-BS-A0TD-01A-11D-A10B-09 | 1.105263 |

|                              |          |
|------------------------------|----------|
| TCGA-B5-A3FC-01A-11D-A228-09 | 590.9737 |
| TCGA-AP-A1DO-01A-11D-A135-09 | 35.73684 |
| TCGA-EO-A1Y8-01A-11D-A159-09 | 1.710526 |
| TCGA-DF-A2KN-01A-11D-A17W-09 | 197.1842 |
| TCGA-JU-AAVI-01A-11D-A403-09 | 1.894737 |
| TCGA-D1-A16N-01A-11D-A12J-09 | 4.236842 |
| TCGA-D1-A0ZZ-01A-11D-A10M-09 | 2.105263 |
| TCGA-B5-A0K6-01A-11W-A062-09 | 9.447368 |
| TCGA-A5-A0R9-01A-11D-A10B-09 | 1.473684 |
| TCGA-FI-A2D0-01A-11D-A17D-09 | 301.6842 |
| TCGA-AP-A0LE-01A-11D-A127-09 | 20.92105 |
| TCGA-A5-A0GU-01A-11W-A062-09 | 1.447368 |
| TCGA-D1-A16O-01A-11D-A12J-09 | 1.105263 |
| TCGA-BS-A0U8-01A-11D-A10B-09 | 16       |
| TCGA-AP-A0LP-01A-12D-A10B-09 | 10.76316 |
| TCGA-AP-A1E1-01A-11D-A135-09 | 25.97368 |
| TCGA-B5-A3S1-01A-11D-A228-09 | 3.552632 |
| TCGA-AP-A1E4-01A-12D-A135-09 | 1.315789 |
| TCGA-EO-A3B1-01A-12D-A19Y-09 | 1.631579 |
| TCGA-BG-A2L7-01A-11D-A18P-09 | 35.57895 |
| TCGA-AX-A2HF-01A-11D-A17D-09 | 0.921053 |
| TCGA-D1-A17K-01A-11D-A12J-09 | 1.710526 |
| TCGA-D1-A0ZU-01A-11D-A10M-09 | 1.157895 |
| TCGA-D1-A160-01A-11D-A122-09 | 18.81579 |
| TCGA-BG-A0MU-01A-11D-A10B-09 | 2.236842 |
| TCGA-D1-A165-01A-11D-A12J-09 | 1.947368 |
| TCGA-AX-A1CC-01A-11D-A135-09 | 0.605263 |
| TCGA-B5-A11E-01A-11D-A10M-09 | 332.7632 |
| TCGA-EO-A1Y7-01A-11D-A159-09 | 2.131579 |
| TCGA-D1-A0ZS-01A-11D-A122-09 | 16.39474 |
| TCGA-A5-A1OF-01A-11D-A14G-09 | 457.0526 |
| TCGA-KP-A3W4-01A-11D-A228-09 | 1.815789 |
| TCGA-K6-A3WQ-01A-11D-A228-09 | 1.552632 |
| TCGA-BG-A18C-01A-11D-A12J-09 | 1.526316 |
| TCGA-A5-A3LO-01A-11D-A228-09 | 1.184211 |
| TCGA-AJ-A3OJ-01A-11D-A228-09 | 49.44737 |
| TCGA-A5-A2K2-01A-11D-A18P-09 | 4.342105 |
| TCGA-PG-A916-01A-11D-A37N-09 | 1.947368 |
| TCGA-EY-A2OP-01A-11D-A19Y-09 | 26.65789 |
| TCGA-B5-A3FB-01A-11D-A19Y-09 | 2.289474 |
| TCGA-B5-A11M-01A-11D-A122-09 | 1        |

|                              |          |
|------------------------------|----------|
| TCGA-AP-A0LO-01A-11W-A062-09 | 0.947368 |
| TCGA-D1-A16Y-01A-31D-A12J-09 | 37.39474 |
| TCGA-FI-A2CY-01A-11D-A17D-09 | 1.315789 |
| TCGA-BG-A0VX-01A-11D-A122-09 | 6.815789 |
| TCGA-EY-A1GK-01A-11D-A13L-09 | 47.57895 |
| TCGA-EO-A22U-01A-11D-A17W-09 | 645.4737 |
| TCGA-AP-A1DM-01A-21D-A135-09 | 20.68421 |
| TCGA-B5-A5OC-01A-21D-A27P-09 | 54.02632 |
| TCGA-AP-A0LL-01A-12D-A127-09 | 1.552632 |
| TCGA-EO-A22X-01A-11D-A17W-09 | 422.2105 |
| TCGA-BG-A0MQ-01A-11D-A10B-09 | 23.10526 |
| TCGA-AX-A2HA-01A-12D-A18P-09 | 85.71053 |
| TCGA-AX-A0IW-01A-11W-A062-09 | 1.710526 |
| TCGA-AJ-A3TW-01A-11D-A228-09 | 4.289474 |
| TCGA-AX-A1CN-01A-11D-A135-09 | 1.078947 |
| TCGA-AJ-A8CV-01A-11D-A37N-09 | 11.39474 |
| TCGA-D1-A0ZN-01A-11D-A122-09 | 1.342105 |
| TCGA-AP-A05D-01A-11W-A027-09 | 0.921053 |
| TCGA-A5-A0GI-01A-11W-A062-09 | 10.39474 |
| TCGA-AX-A2H5-01A-11D-A17D-09 | 1.605263 |
| TCGA-EO-A1Y5-01A-11D-A159-09 | 2.052632 |
| TCGA-AJ-A2QN-01A-11D-A18P-09 | 2.526316 |
| TCGA-AJ-A3BK-01A-11D-A19Y-09 | 2.368421 |
| TCGA-B5-A11I-01A-11D-A10M-09 | 1.605263 |
| TCGA-AP-A0LN-01A-11W-A062-09 | 1.921053 |
| TCGA-AP-A1DK-01A-11D-A135-09 | 470.8684 |
| TCGA-D1-A16J-01A-11D-A12J-09 | 6.921053 |
| TCGA-AP-A05A-01A-11W-A027-09 | 2.342105 |
| TCGA-D1-A16D-01A-11D-A12J-09 | 1.394737 |
| TCGA-AP-A1DR-01A-11D-A135-09 | 45.63158 |
| TCGA-D1-A1NY-01A-11D-A16D-09 | 33.34211 |
| TCGA-A5-A0G9-01A-11W-A062-09 | 9.605263 |
| TCGA-A5-A0GN-01A-11W-A062-09 | 1.605263 |
| TCGA-D1-A16Q-01A-12D-A12J-09 | 1.052632 |
| TCGA-BG-A0W2-01A-11D-A117-09 | 1.184211 |
| TCGA-FI-A2D6-01A-11D-A17D-09 | 38.97368 |
| TCGA-A5-A0RA-01A-21D-A10B-09 | 2.368421 |
| TCGA-AJ-A3OK-01A-12D-A228-09 | 27.55263 |
| TCGA-AP-A0L8-01A-11W-A062-09 | 1.921053 |
| TCGA-B5-A11G-01A-13D-A122-09 | 22.5     |
| TCGA-BK-A4ZD-01A-11D-A27P-09 | 2.789474 |

|                              |          |
|------------------------------|----------|
| TCGA-D1-A2G5-01A-11D-A17D-09 | 8.184211 |
| TCGA-AP-A0LV-01A-11W-A062-09 | 0.815789 |
| TCGA-FI-A2EY-01A-12D-A18P-09 | 3.973684 |
| TCGA-AX-A06B-01A-11W-A027-09 | 1.184211 |
| TCGA-AP-A0LT-01A-11W-A062-09 | 27.92105 |
| TCGA-EY-A214-01A-12D-A159-09 | 1.973684 |
| TCGA-B5-A11Q-01A-11D-A122-09 | 1.447368 |
| TCGA-A5-A0GQ-01A-11D-A122-09 | 2.210526 |
| TCGA-SJ-A6ZI-01A-12D-A34Q-09 | 64.31579 |
| TCGA-B5-A3FD-01A-11D-A19Y-09 | 1.973684 |
| TCGA-AP-A05J-01A-11W-A027-09 | 1.473684 |
| TCGA-EO-A3AU-01A-21D-A19Y-09 | 39.18421 |
| TCGA-AP-A0LM-01A-11D-A122-09 | 445.1842 |
| TCGA-A5-AB3J-01A-11D-A403-09 | 1.526316 |
| TCGA-EO-A3AV-01A-12D-A19Y-09 | 173.8158 |
| TCGA-FI-A2CX-01A-11D-A17D-09 | 0.394737 |
| TCGA-BK-A0CC-01A-21D-A272-09 | 2.263158 |
| TCGA-KP-A3VZ-01A-11D-A228-09 | 3.684211 |
| TCGA-KP-A3W1-01A-11D-A228-09 | 1.763158 |
| TCGA-B5-A11F-01A-11D-A10M-09 | 1.736842 |
| TCGA-AX-A3G4-01A-11D-A20S-09 | 1.631579 |
| TCGA-EY-A1GQ-01A-21D-A13L-09 | 24.84211 |
| TCGA-BS-A0VI-01A-11D-A14G-09 | 16.07895 |
| TCGA-B5-A0K7-01A-11W-A10C-09 | 1.552632 |
| TCGA-A5-A0GW-01A-11W-A062-09 | 13.28947 |
| TCGA-A5-A10J-01A-11D-A14G-09 | 1.552632 |
| TCGA-EY-A1GJ-01A-12D-A142-09 | 1.921053 |
| TCGA-A5-A0G5-01A-11W-A062-09 | 3.973684 |
| TCGA-AX-A1CJ-01A-11D-A135-09 | 2.289474 |
| TCGA-AP-A1DV-01A-21D-A135-09 | 538.6842 |
| TCGA-AX-A1C4-01A-11D-A135-09 | 51.02632 |
| TCGA-A5-A0GB-01A-11W-A062-09 | 28.44737 |
| TCGA-AW-A1PO-01A-12D-A159-09 | 3.236842 |
| TCGA-AJ-A3EM-01A-11D-A20S-09 | 2.184211 |
| TCGA-PG-A915-01A-11D-A37N-09 | 2.605263 |
| TCGA-BG-A0RY-01A-11D-A10B-09 | 1.815789 |
| TCGA-EY-A547-01A-11D-A27P-09 | 8.894737 |
| TCGA-B5-A1N2-01A-21D-A142-09 | 3.921053 |
| TCGA-BG-A0LW-01A-11W-A062-09 | 1.052632 |
| TCGA-B5-A1MW-01A-11D-A17D-09 | 32.07895 |
| TCGA-A5-A0GP-01A-11W-A062-09 | 50.13158 |



|                              |          |
|------------------------------|----------|
| TCGA-DI-A1BU-01A-11D-A135-09 | 365.0526 |
| TCGA-A5-A0R8-01A-11D-A10B-09 | 2.342105 |
| TCGA-EY-A1G8-01A-11D-A13L-09 | 111.5789 |
| TCGA-DI-A1C3-01A-41D-A135-09 | 0.973684 |
| TCGA-FI-A2F4-01A-11D-A17D-09 | 96.84211 |
| TCGA-AP-A0LG-01A-11W-A062-09 | 16.05263 |
| TCGA-QS-A8F1-01A-21D-A37N-09 | 2.710526 |
| TCGA-D1-A15Z-01A-11D-A122-09 | 2.5      |
| TCGA-DF-A2L0-01A-11D-A17W-09 | 1.947368 |
| TCGA-BK-A6W3-01A-12D-A34Q-09 | 169.8947 |
| TCGA-AX-A06L-01A-11D-A122-09 | 1.289474 |
| TCGA-DF-A2KV-01A-11D-A17W-09 | 56.68421 |
| TCGA-AX-A05Z-01A-11W-A027-09 | 227.6053 |
| TCGA-D1-A0ZO-01A-11D-A122-09 | 22.23684 |
| TCGA-AJ-A3BF-01A-11D-A20S-09 | 1.263158 |
| TCGA-D1-A17R-01A-11D-A12J-09 | 7        |
| TCGA-KP-A3W3-01A-11D-A228-09 | 1.552632 |
| TCGA-AJ-A23N-01A-11D-A228-09 | 1.684211 |
| TCGA-BK-A139-01A-11D-A272-09 | 4.315789 |
| TCGA-EY-A212-01A-11D-A14K-09 | 1.736842 |
| TCGA-D1-A17D-01A-12D-A12J-09 | 18.28947 |
| TCGA-EO-A3KU-01A-11D-A228-09 | 2.078947 |
| TCGA-BS-A0TI-01A-11D-A10B-09 | 2.631579 |
| TCGA-AX-A2H4-01A-21D-A18P-09 | 6.605263 |
| TCGA-B5-A0KB-01B-11D-A14G-09 | 1.447368 |
| TCGA-AJ-A2QK-01A-11D-A18P-09 | 2.447368 |
| TCGA-EY-A1GI-01A-11D-A13L-09 | 200.2105 |
| TCGA-A5-A0GM-01A-11W-A062-09 | 1.157895 |
| TCGA-D1-A0ZP-01A-21D-A10M-09 | 1        |
| TCGA-AJ-A2QL-01A-11D-A18P-09 | 1.789474 |
| TCGA-D1-A1O7-01A-11D-A14G-09 | 13.34211 |
| TCGA-KP-A3W0-01A-21D-A228-09 | 1.368421 |
| TCGA-PG-A914-01A-11D-A37N-09 | 4.815789 |
| TCGA-DI-A2QU-01A-11D-A18P-09 | 2.394737 |
| TCGA-AP-A1DQ-01A-11D-A135-09 | 0.842105 |
| TCGA-D1-A174-01A-11D-A12J-09 | 29.47368 |
| TCGA-BS-A0TC-01A-11D-A10B-09 | 46.55263 |
| TCGA-EO-A22T-01A-21D-A18P-09 | 47.94737 |
| TCGA-AX-A05S-01A-11W-A027-09 | 20.60526 |
| TCGA-AP-A053-01A-21W-A027-09 | 1.447368 |
| TCGA-D1-A1NZ-01A-21D-A14G-09 | 38.34211 |

|                              |          |
|------------------------------|----------|
| TCGA-B5-A0JU-01B-11D-A14G-09 | 28.31579 |
| TCGA-BS-A0WQ-01A-21D-A10G-09 | 1.710526 |
| TCGA-B5-A0JV-01A-11D-A10B-09 | 11.55263 |
| TCGA-EO-A3AS-01A-11D-A19Y-09 | 6.289474 |
| TCGA-A5-A7WJ-01A-12D-A34Q-09 | 27.94737 |
| TCGA-AX-A1C7-01A-11D-A135-09 | 1.526316 |
| TCGA-SJ-A6ZJ-01A-12D-A34Q-09 | 2.973684 |
| TCGA-AJ-A2QM-01A-11D-A18P-09 | 6.315789 |
| TCGA-AX-A2HG-01A-11D-A17D-09 | 44.15789 |
| TCGA-AX-A3G8-01A-11D-A228-09 | 43.28947 |
| TCGA-A5-A0R6-01A-11D-A10B-09 | 1.421053 |
| TCGA-E6-A1LZ-01A-11D-A142-09 | 6.605263 |
| TCGA-AX-A2HD-01A-21D-A17D-09 | 392.6316 |
| TCGA-AP-A0LQ-01A-12D-A10B-09 | 1.736842 |
| TCGA-D1-A3DH-01A-11D-A19Y-09 | 4.052632 |
| TCGA-BG-A222-01A-11D-A159-09 | 213.8684 |
| TCGA-D1-A2G0-01A-11D-A17D-09 | 48.31579 |
| TCGA-D1-A16V-01A-11D-A12J-09 | 1.605263 |
| TCGA-B5-A0K9-01A-21D-A100-09 | 28.68421 |
| TCGA-D1-A3DA-01A-12D-A20S-09 | 3        |
| TCGA-DI-A0WH-01A-12D-A12J-09 | 19.23684 |
| TCGA-BG-A0M6-01A-31D-A10B-09 | 1.131579 |
| TCGA-D1-A0ZV-01A-11D-A10M-09 | 1.394737 |
| TCGA-FI-A2EX-01A-11D-A17D-09 | 1.684211 |
| TCGA-AJ-A5DV-01A-11D-A27P-09 | 3.236842 |
| TCGA-BG-A0M7-01A-11W-A062-09 | 1.710526 |
| TCGA-E6-A2P8-01A-11D-A19Y-09 | 32.23684 |
| TCGA-AX-A3G9-01A-11D-A228-09 | 41.07895 |
| TCGA-EY-A215-01A-11D-A14K-09 | 220.9474 |
| TCGA-EO-A3B0-01A-12D-A19Y-09 | 464.7105 |
| TCGA-BS-A0T9-01A-11D-A12J-09 | 2.052632 |
| TCGA-BS-A0UA-01A-11D-A122-09 | 12.65789 |
| TCGA-BG-A187-01A-11D-A12J-09 | 3        |
| TCGA-PG-A7D5-01A-11D-A34Q-09 | 1.605263 |
| TCGA-BK-A6W4-01A-12D-A34Q-09 | 0.368421 |
| TCGA-BK-A0CA-01A-21D-A272-09 | 2.210526 |
| TCGA-EY-A72D-01A-12D-A34Q-09 | 2.105263 |
| TCGA-H5-A2HR-01A-11D-A17W-09 | 1.736842 |
| TCGA-BG-A0M9-01A-21W-A10C-09 | 1.868421 |
| TCGA-EY-A1GC-01A-11D-A13L-09 | 1.5      |
| TCGA-D1-A2G7-01A-21D-A17W-09 | 1.973684 |

|                              |          |
|------------------------------|----------|
| TCGA-AP-A0LH-01A-11W-A062-09 | 1.236842 |
| TCGA-AX-A2HK-01A-11D-A17D-09 | 2.368421 |
| TCGA-BS-A0V8-01A-11D-A122-09 | 2.631579 |
| TCGA-FI-A3PX-01A-11D-A228-09 | 3.236842 |
| TCGA-EY-A1GM-01A-12D-A14G-09 | 1.421053 |
| TCGA-AX-A1CA-01A-12D-A135-09 | 3.184211 |
| TCGA-AP-A05N-01A-11W-A027-09 | 9.210526 |
| TCGA-B5-A11X-01A-11D-A10M-09 | 2.078947 |
| TCGA-AJ-A3BH-01A-11D-A19Y-09 | 124.0526 |
| TCGA-EY-A1GO-01A-11D-A14G-09 | 13.39474 |
| TCGA-AX-A2IO-01A-11D-A17W-09 | 15.21053 |
| TCGA-AP-A0LD-01A-11W-A062-09 | 20.39474 |
| TCGA-B5-A1MZ-01A-11D-A142-09 | 2.078947 |
| TCGA-A5-A0G1-01A-11D-A122-09 | 348.8158 |
| TCGA-EC-A1NJ-01A-31D-A14G-09 | 14.68421 |
| TCGA-EO-A3KX-01A-11D-A228-09 | 151.9211 |
| TCGA-2E-A9G8-01A-11D-A403-09 | 2.789474 |
| TCGA-B5-A0K1-01A-11W-A062-09 | 1.789474 |
| TCGA-D1-A16F-01A-11D-A12J-09 | 16.02632 |
| TCGA-B5-A11U-01A-11D-A122-09 | 14.28947 |
| TCGA-AX-A1CP-01A-11D-A135-09 | 0.868421 |
| TCGA-B5-A0JN-01A-11D-A10B-09 | 3.631579 |
| TCGA-B5-A0JR-01A-13W-A062-09 | 24.42105 |
| TCGA-D1-A17C-01A-11D-A12J-09 | 1.657895 |
| TCGA-A5-A0VQ-01A-11D-A10B-09 | 14.63158 |
| TCGA-A5-A0G3-01A-11W-A062-09 | 1.052632 |
| TCGA-EO-A3AY-01A-12D-A19Y-09 | 156.4474 |
| TCGA-EY-A548-01A-11D-A27P-09 | 31.97368 |
| TCGA-PG-A6IB-01A-21D-A31U-09 | 21.44737 |
| TCGA-A5-A2K3-01A-11D-A17W-09 | 47.05263 |
| TCGA-BS-A0TG-01A-32D-A10B-09 | 1.394737 |
| TCGA-BG-A0M2-01A-11D-A10O-09 | 1.026316 |
| TCGA-D1-A17L-01A-11D-A12J-09 | 1.973684 |
| TCGA-BG-A0MK-01A-51D-A19Y-09 | 2.657895 |
| TCGA-B5-A11P-01B-11D-A14G-09 | 2.131579 |
| TCGA-D1-A2G6-01A-11D-A17D-09 | 3.236842 |
| TCGA-AJ-A3BG-01A-11D-A19Y-09 | 68.18421 |
| TCGA-FI-A2F9-01A-11D-A17D-09 | 1.789474 |
| TCGA-D1-A17A-01A-11D-A12J-09 | 8.894737 |
| TCGA-AJ-A3EJ-01A-11D-A19Y-09 | 2.210526 |
| TCGA-D1-A15X-01A-11D-A122-09 | 57.26316 |

|                              |          |
|------------------------------|----------|
| TCGA-AX-A3GI-01A-11D-A20S-09 | 1.947368 |
| TCGA-AJ-A3IA-01A-11D-A20S-09 | 9.842105 |
| TCGA-AJ-A6NU-01A-11D-A34Q-09 | 1.552632 |
| TCGA-5S-A9Q8-01A-11D-A403-09 | 2.263158 |
| TCGA-BG-A18A-01A-21D-A12J-09 | 2.078947 |
| TCGA-BS-A0TA-01A-11D-A10B-09 | 13.21053 |
| TCGA-B5-A0JY-01A-11D-A10B-09 | 358      |
| TCGA-EY-A549-01A-11D-A27P-09 | 62.73684 |
| TCGA-AX-A1CR-01A-12D-A135-09 | 2.026316 |
| TCGA-AJ-A3EK-01A-11D-A19Y-09 | 248.6053 |
| TCGA-AX-A1C9-01A-11D-A135-09 | 44.39474 |
| TCGA-D1-A17M-01A-21D-A12J-09 | 14.92105 |
| TCGA-PG-A917-01A-31D-A37N-09 | 39.89474 |
| TCGA-AX-A3FV-01A-11D-A228-09 | 3.894737 |
| TCGA-EY-A1GD-01A-11D-A13L-09 | 46.13158 |
| TCGA-AJ-A3BI-01A-11D-A20S-09 | 1.447368 |
| TCGA-BK-A13B-01A-51D-A228-09 | 37.21053 |
| TCGA-AP-A05P-01A-11W-A062-09 | 1.105263 |
| TCGA-AX-A2IN-01A-12D-A17W-09 | 27.73684 |
| TCGA-E6-A2P9-01A-11D-A19Y-09 | 51.47368 |
| TCGA-AX-A3G6-01A-11D-A20S-09 | 2.078947 |
| TCGA-A5-A1OH-01A-21D-A228-09 | 4.447368 |
| TCGA-B5-A3FA-01A-11D-A19Y-09 | 438.2632 |
| TCGA-BG-A2AE-01A-11D-A16D-09 | 2.052632 |
| TCGA-B5-A121-01A-31D-A122-09 | 1.131579 |
| TCGA-AX-A3FZ-01A-11D-A228-09 | 1.605263 |
| TCGA-DI-A2QT-01A-12D-A19Y-09 | 1.157895 |
| TCGA-EY-A2OO-01A-11D-A19Y-09 | 2.263158 |
| TCGA-EY-A5W2-01A-11D-A31U-09 | 42.18421 |
| TCGA-B5-A5OD-01A-11D-A31U-09 | 1.684211 |
| TCGA-AX-A3FS-01A-11D-A228-09 | 43.39474 |
| TCGA-EY-A54A-01A-11D-A27P-09 | 3.131579 |
| TCGA-A5-A0VO-01A-21D-A10G-09 | 2.342105 |
| TCGA-BG-A0VW-01A-11D-A122-09 | 12.36842 |
| TCGA-D1-A161-01A-11D-A122-09 | 2.868421 |
| TCGA-D1-A16B-01A-11D-A12J-09 | 1.473684 |
| TCGA-B5-A11J-01A-11D-A122-09 | 16.71053 |
| TCGA-B5-A1MR-01A-31D-A14G-09 | 224.5263 |
| TCGA-AP-A051-01A-21W-A027-09 | 291.8421 |
| TCGA-AP-A5FX-01A-11D-A27P-09 | 1.605263 |
| TCGA-FI-A2EW-01A-11D-A17D-09 | 3.315789 |

|                              |          |
|------------------------------|----------|
| TCGA-B5-A11S-01A-11D-A122-09 | 1.736842 |
| TCGA-DI-A1NO-01A-31D-A159-09 | 10.10526 |
| TCGA-BS-A0TJ-01A-11D-A10B-09 | 27       |
| TCGA-B5-A0K3-01A-11W-A062-09 | 1.447368 |
| TCGA-BG-A0M4-01A-11W-A10C-09 | 18.07895 |
| TCGA-FI-A2D4-01A-12D-A17D-09 | 22       |
| TCGA-BG-A0MI-01A-11W-A062-09 | 1.973684 |
| TCGA-AJ-A3NG-01A-11D-A228-09 | 2.894737 |
| TCGA-BS-A0V7-01A-21D-A122-09 | 1.210526 |
| TCGA-BS-A0UF-01A-11D-A10B-09 | 295.7368 |
| TCGA-BG-A186-01A-11D-A12J-09 | 1.052632 |
| TCGA-BG-A0MT-01A-11D-A10B-09 | 1.105263 |
| TCGA-EY-A1GH-01A-11D-A13L-09 | 2.605263 |
| TCGA-AX-A1CK-01A-11D-A135-09 | 2.657895 |
| TCGA-D1-A17N-01A-11D-A12J-09 | 0.947368 |
| TCGA-4E-A92E-01A-11D-A37N-09 | 6.842105 |
| TCGA-AJ-A8CW-01A-11D-A37N-09 | 37.15789 |
| TCGA-DI-A2QY-01A-12D-A19Y-09 | 3.184211 |
| TCGA-AJ-A3BD-01A-11D-A19Y-09 | 2.552632 |
| TCGA-B5-A11H-01A-11D-A122-09 | 41.39474 |
| TCGA-D1-A15V-01A-11D-A122-09 | 1.473684 |
| TCGA-D1-A17T-01A-11D-A12J-09 | 2.263158 |
| TCGA-AX-A05U-01A-11W-A027-09 | 1        |
| TCGA-QF-A5YS-01A-11D-A31U-09 | 69.36842 |
| TCGA-B5-A11L-01B-21D-A13L-09 | 4.236842 |
| TCGA-BG-A0MG-01A-21D-A10B-09 | 3.421053 |
| TCGA-D1-A1NU-01A-11D-A14G-09 | 2.684211 |
| TCGA-AX-A2H8-01A-11D-A17D-09 | 1.947368 |
| TCGA-A5-A0G2-01A-11W-A062-09 | 978.1316 |
| TCGA-BG-A0MC-01A-21W-A062-09 | 1.631579 |
| TCGA-B5-A1MX-01A-11D-A142-09 | 264.8947 |
| TCGA-AP-A05H-01A-11W-A027-09 | 2.078947 |
| TCGA-D1-A3JQ-01A-11D-A228-09 | 1.210526 |
| TCGA-QS-A5YR-01A-31D-A31U-09 | 12.63158 |
| TCGA-AX-A0IU-01A-11D-A10B-09 | 1.815789 |
| TCGA-D1-A17F-01A-11D-A12J-09 | 7.289474 |
| TCGA-B5-A11Y-01A-21D-A10M-09 | 34.44737 |
| TCGA-BG-A3PP-01A-11D-A228-09 | 2.131579 |
| TCGA-EY-A1GS-01A-11D-A13L-09 | 8.578947 |
